# Supplementary material
Source: PubMed Central journal article supplement (PMC3695376)
Supplement: NIHMS476943-supplement-Supplemental_Tables.pdf [file NIHMS476943-supplement-Supplemental_Tables.pdf]

Supplemental Tables for:  
Does Life Seem Better on a Sunny Day?  
Examining the Association Between Daily Weather Conditions and Life Satisfaction  
Judgments

Richard E. Lucas  
Michigan State University

Nicole M. Lawless  
University of Oregon

Richard E. Lucas  
Department of Psychology  
Michigan State University  
East Lansing, MI 48823  
e-mail: lucasri@msu.edu

Supplemental Tables for:

Does Life Seem Better on a Sunny Day?

Examining the Association Between Daily Weather Conditions and Life Satisfaction

Judgments

**Supplemental Tables**

Table 1  
*Estimates for Precipitation, Snowfall, Minimum and Maximum Temperature Using the County-Level Data.*

|                      | Precipitation |         | Snowfall  |           | Minimum Temp. |         | Maximum Temp. |         |
|----------------------|---------------|---------|-----------|-----------|---------------|---------|---------------|---------|
|                      | Estimate      | SE      | Estimate  | SE        | Estimate      | SE      | Estimate      | SE      |
| (Intercept)          | 3.384*        | 0.001   | 3.385*    | 0.001     | 3.385*        | 0.001   | 3.384*        | 0.001   |
| Daily                | -0.027        | 0.023   | 0.129     | 0.232     | -0.125        | 0.077   | -0.072        | 0.066   |
| Monthly              | -0.215        | 0.126   | 0.530     | 0.566     | -0.029        | 0.038   | -0.032        | 0.036   |
| County               | -1.184*       | 0.346   | 5.376*    | 1.684     | 0.046         | 0.170   | 0.204         | 0.169   |
| Daily:Monthly        | 3.604         | 4.151   | 47.730    | 88.095    | 4.974         | 5.573   | 4.469         | 4.580   |
| Daily:County         | 3.716         | 5.996   | -150.832  | 152.463   | -5.797        | 10.063  | -1.576        | 8.786   |
| Monthly:County       | 12.289        | 23.414  | -694.985* | 318.708   | -19.557*      | 4.993   | -19.881*      | 4.722   |
| Daily:Monthly:County | -399.783      | 664.057 | 2857.105  | 39721.370 | -133.385      | 734.747 | 81.122        | 621.607 |

Note. \* = p<.05.

Table 2

*Estimates for Maximum Relative Humidity, Average Wind Speed, and Barometric Pressure Using the County-Level Data.*

|                      | Humidity |       | Wind Speed |       | Pressure |        |
|----------------------|----------|-------|------------|-------|----------|--------|
|                      | Estimate | SE    | Estimate   | SE    | Estimate | SE     |
| (Intercept)          | 3.385*   | 0.003 | 3.385*     | 0.003 | 3.385*   | 0.003  |
| Daily                | 0.007    | 0.010 | -0.018     | 0.026 | 0.108*   | 0.048  |
| Monthly              | -0.033*  | 0.015 | 0.079      | 0.057 | 0.141    | 0.107  |
| County               | 0.011    | 0.031 | -0.092     | 0.108 | -0.040*  | 0.017  |
| Daily:Monthly        | 0.208    | 0.160 | -1.316     | 1.751 | 10.898*  | 5.173  |
| Daily:County         | -0.001   | 0.070 | -0.068     | 0.402 | -0.523   | 0.341  |
| Monthly:County       | -0.138   | 0.086 | -1.088     | 0.650 | -1.100   | 0.672  |
| Daily:Monthly:County | 0.630    | 0.749 | 5.132      | 7.961 | -2.094   | 42.561 |

Note. \*=p<.05.

Table 3  
*Estimates for Extreme Precipitation, Snowfall, and Temperature Using the County-Level Data.*

|                        | Precipitation |        | Snowfall  |          | Heat     |        | Cold     |        |
|------------------------|---------------|--------|-----------|----------|----------|--------|----------|--------|
|                        | Estimate      | SE     | Estimate  | SE       | Estimate | SE     | Estimate | SE     |
| (Intercept)            | 3.384*        | 0.001  | 3.385*    | 0.001    | 3.385*   | 0.001  | 3.384*   | 0.001  |
| Extreme                | -0.003        | 0.003  | 0.026     | 0.029    | -0.004   | 0.002  | 0.001    | 0.002  |
| Monthly                | -0.230        | 0.132  | 0.493     | 0.568    | -0.052   | 0.038  | -0.016   | 0.040  |
| County                 | -1.175*       | 0.347  | 5.327*    | 1.685    | 0.178    | 0.171  | -0.017   | 0.172  |
| Extreme:Monthly        | 0.537         | 0.512  | -3.772    | 10.904   | 0.059    | 0.138  | -0.087   | 0.152  |
| Extreme:County         | 0.568         | 0.665  | -0.894    | 20.330   | 0.115    | 0.276  | 0.273    | 0.276  |
| Monthly:County         | 19.936        | 25.054 | -700.435* | 320.593  | -19.540* | 4.976  | -18.203* | 5.277  |
| Extreme:Monthly:County | -110.348      | 86.737 | 806.086   | 4780.674 | -3.801   | 19.161 | -4.167   | 20.456 |

Note. \*= $p < .05$ .

Table 4

*Estimates for Extreme Humidity, Wind, and Pressure Using the County-Level Data.*

|                        | High Humidity |       | Low Humidity |       | Wind Speed |       | High Pressure |       | Low Pressure |       |
|------------------------|---------------|-------|--------------|-------|------------|-------|---------------|-------|--------------|-------|
|                        | Estimate      | SE    | Estimate     | SE    | Estimate   | SE    | Estimate      | SE    | Estimate     | SE    |
| (Intercept)            | 3.386*        | 0.003 | 3.385*       | 0.003 | 3.386*     | 0.003 | 3.385*        | 0.003 | 3.385*       | 0.003 |
| Extreme                | -0.000        | 0.003 | -0.003       | 0.011 | -0.004     | 0.005 | 0.010*        | 0.005 | -0.006       | 0.004 |
| Monthly                | -0.022        | 0.017 | -0.020       | 0.018 | 0.112      | 0.061 | 0.090         | 0.109 | 0.176        | 0.110 |
| County                 | 0.016         | 0.031 | 0.016        | 0.032 | -0.048     | 0.119 | -0.039*       | 0.017 | -0.042*      | 0.017 |
| Extreme:Monthly        | -0.043        | 0.045 | -0.058       | 0.055 | -0.175     | 0.247 | 1.655*        | 0.569 | -0.623       | 0.472 |
| Extreme:County         | -0.047        | 0.050 | -0.006       | 0.043 | -0.064     | 0.134 | -0.103*       | 0.039 | 0.067*       | 0.028 |
| Monthly:County         | -0.095        | 0.093 | -0.181       | 0.123 | -0.472     | 1.602 | -0.941        | 0.681 | -1.114       | 0.686 |
| Extreme:Monthly:County | 0.046         | 0.389 | -0.016       | 0.238 | -0.081     | 1.964 | -11.454*      | 4.686 | 2.332        | 3.495 |

Note. \* = p&lt;.05.

Table 5

*Estimates for Weather Variables When Change in Conditions is Included in the Model and Using County-Level Data.*

|             | Precipitation |          | Snowfall   |            | Minimum Temp. |            | Maximum Temp. |           |
|-------------|---------------|----------|------------|------------|---------------|------------|---------------|-----------|
|             | Estimate      | SE       | Estimate   | SE         | Estimate      | SE         | Estimate      | SE        |
| (Intercept) | 3.384*        | 0.001    | 3.385*     | 0.001      | 3.385*        | 0.001      | 3.385*        | 0.001     |
| Daily (D)   | -0.054        | 0.034    | 0.044      | 0.363      | -0.147        | 0.083      | -0.033        | 0.071     |
| Change (Ch) | 0.037         | 0.024    | -0.075     | 0.231      | 0.055         | 0.110      | -0.244*       | 0.099     |
| Monthly (M) | -0.207        | 0.128    | 0.464      | 0.573      | -0.016        | 0.040      | -0.012        | 0.037     |
| County (Co) | -1.186*       | 0.346    | 5.287*     | 1.687      | 0.052         | 0.172      | 0.182         | 0.171     |
| D:Ch        | -0.005        | 0.191    | 3.477      | 5.360      | -20.311       | 13.920     | -21.347*      | 9.681     |
| D:M         | 6.049         | 6.016    | 76.416     | 131.003    | 1.882         | 6.040      | 5.693         | 4.992     |
| Ch:M        | -2.861        | 4.511    | -42.335    | 87.938     | 9.840         | 7.885      | -12.469       | 6.688     |
| D:Co        | 5.934         | 8.265    | -151.253   | 216.529    | -14.083       | 10.841     | -1.148        | 9.514     |
| Ch:Co       | -3.497        | 6.275    | 45.900     | 153.986    | 23.214        | 14.498     | -9.662        | 13.486    |
| M:Co        | 11.157        | 23.581   | -712.170*  | 323.589    | -18.664*      | 5.222      | -18.443*      | 4.923     |
| D:Ch:M      | -2.706        | 25.598   | -523.106   | 1635.661   | -1722.812     | 932.649    | -1549.439*    | 612.792   |
| D:Ch:Co     | 5.590         | 38.627   | -667.848   | 2902.386   | -1955.350     | 1826.272   | -385.805      | 1326.153  |
| D:M:Co      | -821.059      | 911.127  | -26085.856 | 53099.071  | -777.409      | 794.933    | -167.025      | 674.903   |
| Ch:M:C      | 421.173       | 770.254  | 29649.012  | 37396.144  | 1955.105      | 1049.270   | -26.908       | 930.288   |
| D:Ch:M:C    | 772.528       | 3507.078 | 385288.163 | 687639.417 | -165035.123   | 120174.174 | -110090.125   | 85334.777 |

Note. \* = p<.05.

Table 6

*Estimates for Maximum Relative Humidity, Average Wind Speed, and Barometric Pressure When Change in Conditions is Included in the Model and Using County-Level Data.*

|                             | Humidity |       | Wind Speed |         | Pressure |          |
|-----------------------------|----------|-------|------------|---------|----------|----------|
|                             | Estimate | SE    | Estimate   | SE      | Estimate | SE       |
| (Intercept)                 | 3.385*   | 0.003 | 3.385*     | 0.003   | 3.385*   | 0.003    |
| Daily                       | 0.006    | 0.012 | -0.046     | 0.033   | 0.143*   | 0.055    |
| Change                      | 0.003    | 0.011 | 0.038      | 0.028   | -0.034   | 0.058    |
| Monthly                     | -0.026   | 0.016 | 0.087      | 0.062   | 0.136    | 0.107    |
| County                      | 0.009    | 0.031 | -0.089     | 0.108   | -0.043*  | 0.017    |
| Daily:Change                | 0.046    | 0.070 | 0.148      | 0.494   | 0.622    | 1.996    |
| Daily:Monthly               | 0.239    | 0.186 | 0.646      | 2.207   | 12.504   | 6.476    |
| Daily:County                | 0.071    | 0.079 | 0.153      | 0.502   | -0.140   | 0.382    |
| Change:Monthly              | -0.108   | 0.180 | -2.535     | 1.851   | -11.072  | 6.049    |
| Change:County               | -0.191*  | 0.086 | -0.233     | 0.435   | -0.638   | 0.415    |
| Monthly:County              | -0.116   | 0.090 | -1.168     | 0.722   | -1.152   | 0.680    |
| Daily:Change:Monthly        | -1.097   | 0.996 | -12.298    | 30.336  | -46.769  | 81.145   |
| Daily:Change:County         | 0.299    | 0.421 | -1.843     | 3.107   | 26.228   | 17.329   |
| Daily:Monthly:County        | 1.235    | 0.843 | 0.082      | 9.962   | -23.334  | 47.720   |
| Change:Monthly:County       | -1.808*  | 0.903 | 5.213      | 8.561   | 17.601   | 46.849   |
| Daily:Change:Monthly:County | -5.123   | 4.659 | 53.176     | 115.448 | 1115.943 | 1131.566 |

Note. \* =  $p < .05$ .



SUPPLEMENTAL TABLES

Table 7

*Estimates for Gender Effects in Metro-Area-Level Data.*

|             | Cloud Cover |       | Temperature |       | Precipitation |         | Pressure |       | Wind Speed |         | Humidity |       |
|-------------|-------------|-------|-------------|-------|---------------|---------|----------|-------|------------|---------|----------|-------|
|             | Estimate    | SE    | Estimate    | SE    | Estimate      | SE      | Estimate | SE    | Estimate   | SE      | Estimate | SE    |
| Intercept   | 3.392*      | 0.003 | 3.394*      | 0.003 | 3.394*        | 0.003   | 3.394*   | 0.003 | 3.395*     | 0.003   | 3.395*   | 0.003 |
| Daily (D)   | -0.000      | 0.004 | -0.005      | 0.015 | 0.021         | 0.039   | 0.012*   | 0.005 | -0.007     | 0.032   | -0.007   | 0.008 |
| Monthly (M) | 0.009       | 0.015 | -0.007      | 0.007 | 0.097         | 0.269   | 0.026    | 0.017 | -0.052     | 0.095   | 0.035    | 0.020 |
| Area (A)    | -0.113*     | 0.027 | 0.107*      | 0.029 | -0.375        | 0.581   | 0.006    | 0.068 | -0.017     | 0.135   | -0.068*  | 0.033 |
| Female (F)  | -0.006*     | 0.001 | -0.007*     | 0.001 | -0.007*       | 0.001   | -0.006*  | 0.001 | -0.006*    | 0.001   | -0.006*  | 0.001 |
| D:M         | -0.085      | 0.067 | 0.061       | 0.103 | -1.370        | 4.204   | -0.028   | 0.089 | 3.717      | 3.080   | -0.091   | 0.164 |
| D:A         | -0.012      | 0.049 | 0.249       | 0.216 | -7.352        | 6.680   | 0.163    | 0.142 | 1.995      | 1.584   | 0.049    | 0.097 |
| M:A         | 0.012       | 0.173 | -0.177      | 0.101 | -48.598       | 35.303  | 0.022    | 0.360 | 5.519      | 4.808   | -0.059   | 0.164 |
| D:F         | 0.003       | 0.005 | -0.006      | 0.019 | -0.031        | 0.049   | -0.012   | 0.007 | 0.016      | 0.041   | 0.012    | 0.010 |
| M:F         | -0.012      | 0.020 | 0.004       | 0.009 | -0.213        | 0.341   | -0.044*  | 0.022 | 0.175      | 0.120   | -0.058*  | 0.025 |
| A:F         | 0.048*      | 0.014 | -0.052*     | 0.016 | -0.289        | 0.289   | 0.004    | 0.036 | 0.114      | 0.067   | 0.048*   | 0.016 |
| D:M:A       | -0.689      | 0.772 | 3.457*      | 1.442 | 102.882       | 486.441 | 2.499    | 1.785 | 116.488    | 140.308 | 0.505    | 1.308 |
| D:M:F       | 0.052       | 0.085 | -0.036      | 0.130 | -0.144        | 5.491   | 0.136    | 0.113 | -5.296     | 3.899   | 0.040    | 0.208 |
| D:A:F       | 0.018       | 0.062 | -0.120      | 0.273 | 20.676*       | 8.746   | -0.113   | 0.182 | -4.779*    | 2.015   | -0.054   | 0.123 |
| M:A:F       | -0.043      | 0.219 | 0.115       | 0.128 | 76.868        | 45.657  | -0.594   | 0.460 | -4.086     | 6.110   | 0.093    | 0.209 |
| D:M:A:F     | 1.646       | 0.981 | -2.961      | 1.833 | -204.337      | 619.715 | -3.870   | 2.298 | -57.365    | 178.823 | -0.361   | 1.662 |

Note. \* = p < .05.
